# Supplementary material
Source: PubMed Central journal article supplement (PMC4639971)
Supplement: JCI83553sd.pdf [file JCI83553sd.pdf]

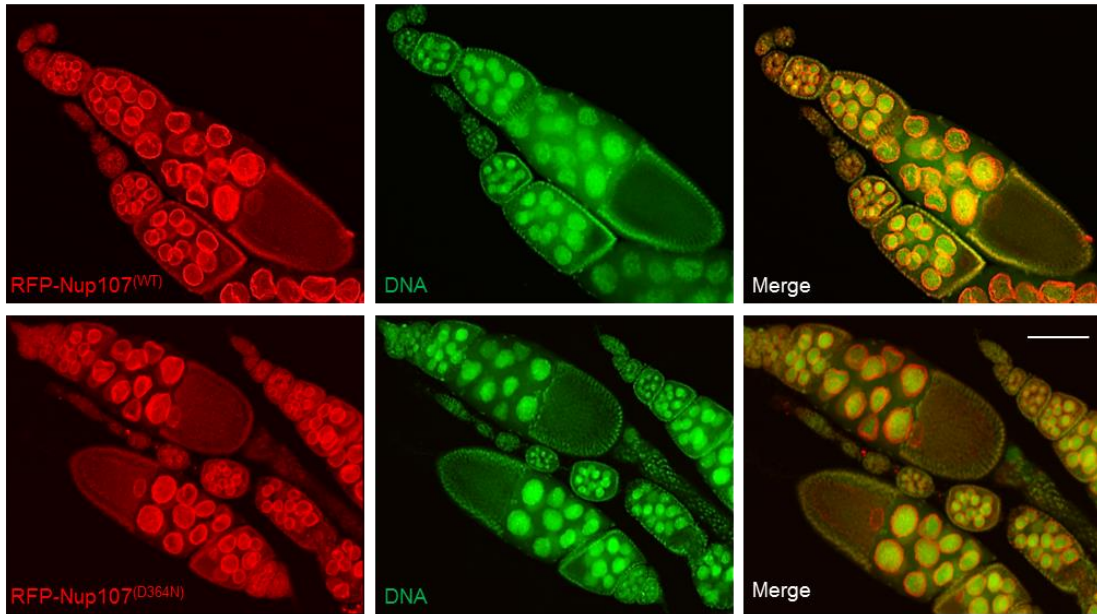

812  
813 **Figure S1. RFP-Nup107 WT and mutant D364N protein localization.** Both transgenic WT  
814 RFP-Nup107<sup>(WT)</sup> (upper panel) and mutant RFP-Nup107<sup>(D364N)</sup> (bottom panel) are correctly  
815 localized to the nuclear membrane rim, as indicated in **Red** by the RFP-Nup107 protein,  
816 which envelops the nuclear DNA (Sytox, **Green**). Scale bar: 100µm.

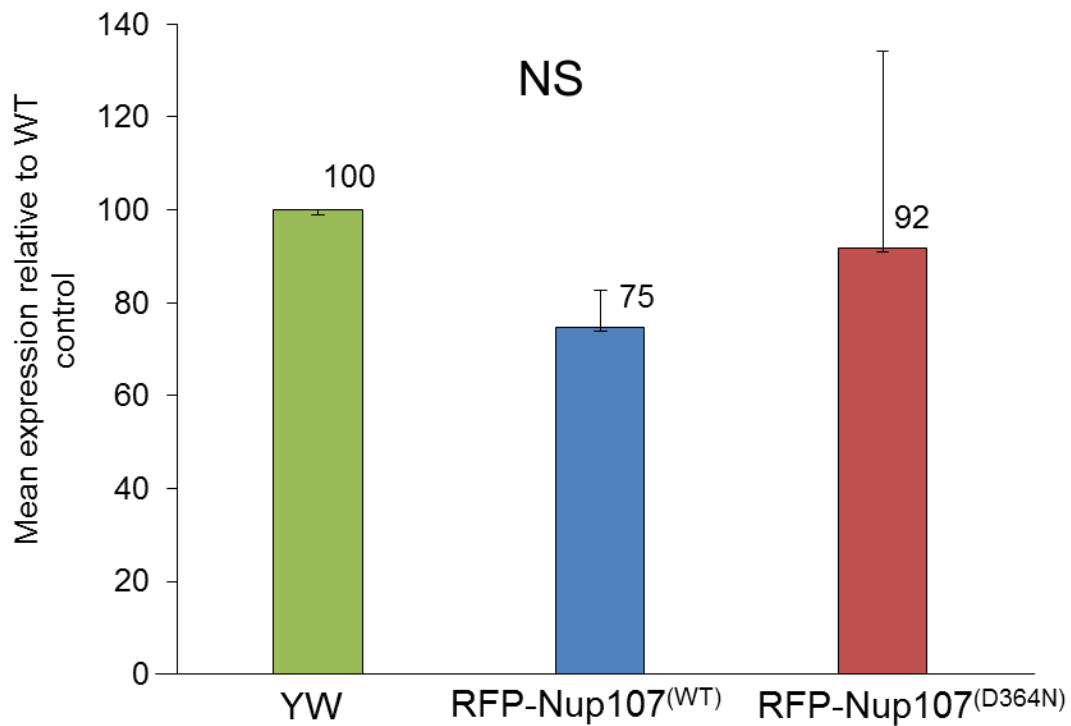

817  
818  
819  
820  
821  
822  
823  
824

**Figure S2. Nup107 transcript levels in ovaries from wild type and transgenic flies.** Endogenous and transgenic Nup107 transcripts are expressed at comparable levels. Quantitative real-time PCR using Taqman assays (see methods) was performed on pooled RNA from 10 ovaries of each genotype and normalized to the ovarian house-keeping gene *RpS17*. Results shown are the mean of four experiments, each conducted in triplicate. NS- Not significant. Statistical significance was assessed by a two-tailed, unpaired Student's t-test.

825 **Table S1-** Next Generation Sequencing data analysis:

| Data filtering criteria                                                                                                                                                 | Affected individual (Figure 1A) |        |
|-------------------------------------------------------------------------------------------------------------------------------------------------------------------------|---------------------------------|--------|
|                                                                                                                                                                         | IV-1                            | IV-5   |
| Total variants                                                                                                                                                          | 48,000                          | 47,948 |
| Variants with Read depth $\geq 5$                                                                                                                                       | 43,106                          | 42,255 |
| Coding / Splicing variants *                                                                                                                                            | 21,120                          | 20,109 |
| Homozygous variants                                                                                                                                                     | 6,265                           | 6,286  |
| Shared among both affected                                                                                                                                              | 832                             |        |
| Frequency $\leq 1\%$                                                                                                                                                    | 207                             |        |
| Polyphen2 score $\geq 0.6$ , SIFT score $\leq 0.05$                                                                                                                     | 72                              |        |
| Co-segregation in additional relatives**:<br>homozygous in additional affected females<br>IV-6 & IV-7 and not homozygous for the<br>same alleles in healthy female IV-2 | 1                               |        |

826 \* Missense, nonsense, splicing, frameshift, codon insertion/deletion

827 \*\* Based on SNP array data (see Methods)
